# Supplementary material for: Evidence of vascular endothelial dysfunction in Wooden Breast disorder in chickens: Insights through gene expression analysis, ultra-structural evaluation and supervised machine learning methods
Source: PLoS One. 2021 Jan 4;16(1):e0243983. doi: 10.1371/journal.pone.0243983 (PMC7781381; doi:10.1371/journal.pone.0243983)
Supplement: S1 Table — (XLSX) [file pone.0243983.s001.xlsx]

## Sheet: Sheet1
Housekeeping	DHX8
Housekeeping	F1NKN8_CHICK
Housekeeping	F1NZG6_CHICK
Housekeeping	FAM120A
Housekeeping	FNTA
Housekeeping	GDI2
Housekeeping	HMG1
Housekeeping	HPRT1
Housekeeping	MARK3
Housekeeping	NAA30
Housekeeping	Q5ZII1_CHICK
Housekeeping	SDF4
Endogenous	ACE
Endogenous	ACOT13
Endogenous	ADAM8
Endogenous	ADPRHL1
Endogenous	ALB
Endogenous	AMIGO2
Endogenous	AMN
Endogenous	AMY2A
Endogenous	ANGPTL5
Endogenous	ANKRD2
Endogenous	ANPEP (APN)
Endogenous	APOA1
Endogenous	APOA4
Endogenous	AQP4
Endogenous	ARHGAP40
Endogenous	ARNT2
Endogenous	ATP6V0D2
Endogenous	ATP9A
Endogenous	AVD
Endogenous	BAG2
Endogenous	BCAN
Endogenous	BFSP1
Endogenous	BPI
Endogenous	BRT-1
Endogenous	C15orf40
Endogenous	C1ORF174
Endogenous	C1QTNF6
Endogenous	C5ORF13
Endogenous	CA3
Endogenous	CA4
Endogenous	CACNA1D
Endogenous	CAMK1G
Endogenous	CAST
Endogenous	CCDC27
Endogenous	CDCA7L
Endogenous	CEBPB
Endogenous	CHIA
Endogenous	CKMT2
Endogenous	CLMN
Endogenous	CNTFR
Endogenous	COMP
Endogenous	CRH
Endogenous	CSRP3
Endogenous	CYBRD1
Endogenous	DACT2
Endogenous	DCTD
Endogenous	DGAT2
Endogenous	DSG2
Endogenous	ENSGALT00000007172
Endogenous	ENSGALT00000015699
Endogenous	ENSGALT00000027168
Endogenous	ENSGALT00000042669
Endogenous	ENSGALT00000043615
Endogenous	ESM1
Endogenous	FABP1
Endogenous	FABP2
Endogenous	FAM150B
Endogenous	FAM35A
Endogenous	FGA
Endogenous	FGB
Endogenous	FGF1
Endogenous	FGF10
Endogenous	FGF19
Endogenous	FGG
Endogenous	FHL1
Endogenous	GABRA5
Endogenous	GABRB2
Endogenous	GAL10
Endogenous	GAL7
Endogenous	GAL8
Endogenous	GAPDH
Endogenous	GHOX-7
Endogenous	GHR
Endogenous	GMPS
Endogenous	GPC3
Endogenous	GRIK1
Endogenous	GRXCR1
Endogenous	HNF1A
Endogenous	HS3ST2
Endogenous	HSPB7
Endogenous	IL15
Endogenous	IL20RA
Endogenous	IL5RA
Endogenous	INSIG1
Endogenous	JSC
Endogenous	KCNC2
Endogenous	KIAA1199
Endogenous	KPNA7
Endogenous	LAMB2
Endogenous	LGALS3
Endogenous	LINGO1
Endogenous	LMOD2
Endogenous	LOC100859127
Endogenous	LOC415661
Endogenous	LOC417800
Endogenous	LOC425001
Endogenous	LOC427654
Endogenous	LOC770405
Endogenous	LOC776146
Endogenous	LPL
Endogenous	LRP11
Endogenous	LUZP2
Endogenous	MAP1LC3C
Endogenous	MAPKAPK3
Endogenous	MB
Endogenous	METTL21CP1
Endogenous	MLANA
Endogenous	MME
Endogenous	MMP1
Endogenous	MMP11
Endogenous	MMP9
Endogenous	MSLNL
Endogenous	MT-ND2
Endogenous	MT-ND3
Endogenous	MUSTN1
Endogenous	MXRA8
Endogenous	MYBPC1
Endogenous	MYH13
Endogenous	MYH1A
Endogenous	MYH1B
Endogenous	MYH1C
Endogenous	MYH1D
Endogenous	MYH1E
Endogenous	MYL2
Endogenous	MYL3
Endogenous	MYO1A
Endogenous	MYOM3
Endogenous	MYOZ2
Endogenous	NCAM1
Endogenous	NIM1
Endogenous	NMRAL1
Endogenous	NOV
Endogenous	NRSN1
Endogenous	NXPH2
Endogenous	OCSTAMP
Endogenous	PCDH7
Endogenous	PDE11A
Endogenous	PDE1B
Endogenous	PGAM1
Endogenous	PHGDH
Endogenous	PHKA1
Endogenous	PIT 54
Endogenous	PKD2L2
Endogenous	PPARGC1B
Endogenous	PPP1R27
Endogenous	PPP1R36
Endogenous	PRG4
Endogenous	PROKR2
Endogenous	PTX3
Endogenous	PVALB
Endogenous	RET
Endogenous	RHOBTB3
Endogenous	ROBO1
Endogenous	RRP1B
Endogenous	RXRA
Endogenous	SCD
Endogenous	SCNN1B
Endogenous	SDK1
Endogenous	SELP
Endogenous	SLC25A30
Endogenous	SLC34A2 (NaP)
Endogenous	SLC35E2B
Endogenous	SLC4A10
Endogenous	SMPX
Endogenous	SPON2
Endogenous	SPP1
Endogenous	STK17A
Endogenous	STMN2
Endogenous	SYBU
Endogenous	TET2
Endogenous	TGFB3
Endogenous	TGM4
Endogenous	TLCD2
Endogenous	TLR2-1
Endogenous	TLR2-2
Endogenous	TLR4
Endogenous	TLR5
Endogenous	TMEM38B
Endogenous	TMOD1
Endogenous	TNFRSF19
Endogenous	TPI1
Endogenous	TRIM59
Endogenous	TTC9
Endogenous	TTPA
Endogenous	TTR
Endogenous	USH1C
Endogenous	UTS2R
Endogenous	VAT1L
Endogenous	WDR92
Endogenous	WISP2
Endogenous	XKRX
Endogenous	ZNF650
